# Supplementary material for: Preparation and catalytic performance of a novel highly dispersed bifunctional catalyst Pt@Fe-MCM-41
Source: Royal Society of Chemistry journal article supplement (doi:10.1039/c5ra21562e), 2016-01-01
Supplement: c5ra21562e1.pdf [file c5ra21562e1.pdf]

## Supplementary Information

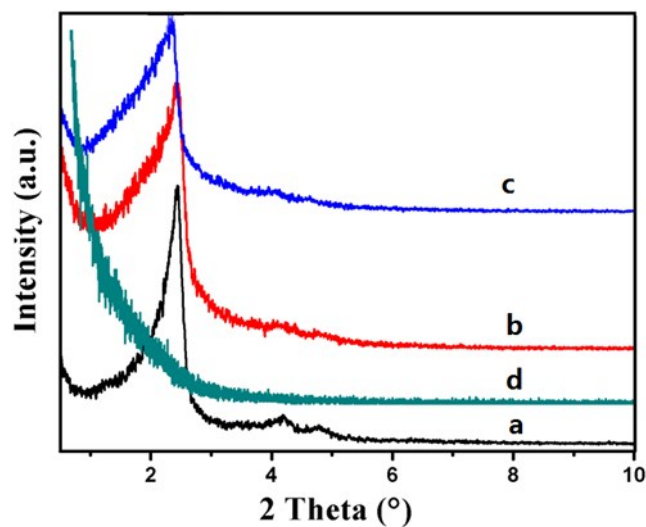

**Fig. S1** Low-angle XRD patterns of different iron content samples with 0.3wt% platinum:  
a. 7wt%, b. 10wt%, c. 12wt%, d. 13.5wt%

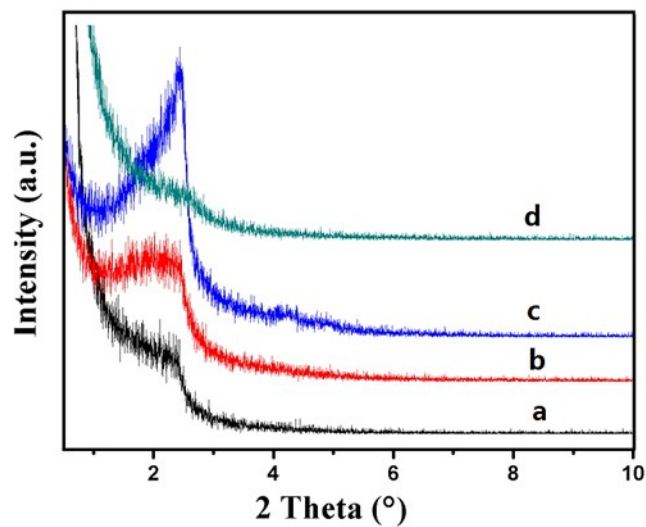

**Fig. S2** Low-angle XRD patterns of different platinum content samples with 12wt% iron:  
a. 0.1wt%, b. 0.2wt%, c. 0.3wt%, d. 0.4wt%

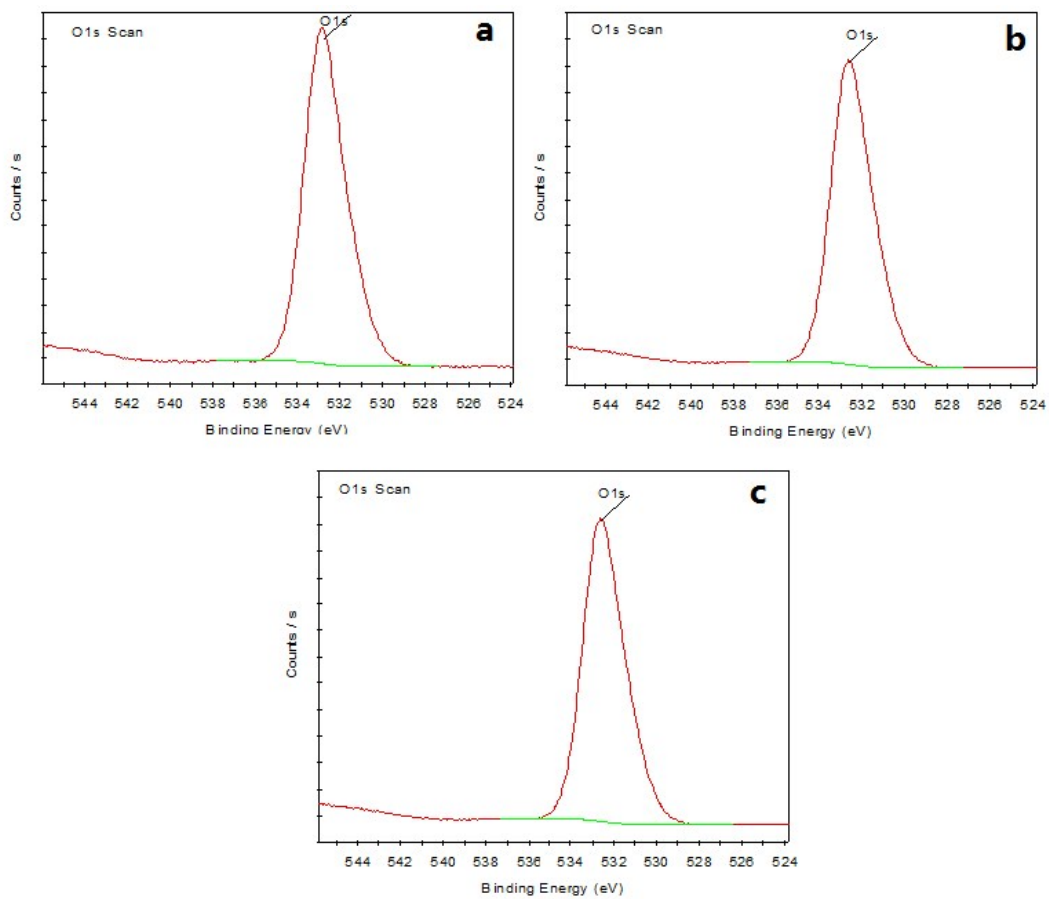

**Fig. S3** O1s spectra from XPS of different samples:  
 a. 0.3%Pt@7%Fe-MCM-41, b. 0.3%Pt@10%Fe-MCM-41, c. 0.3%Pt@12%Fe-MCM-41

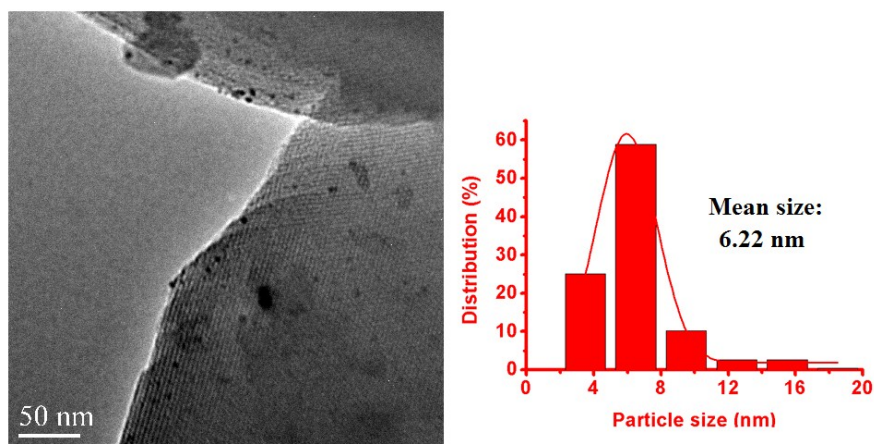

**Fig. S4** HRTEM image and the corresponding Pt particle size distribution of the 0.3%Pt/12%Fe-MCM-41 sample

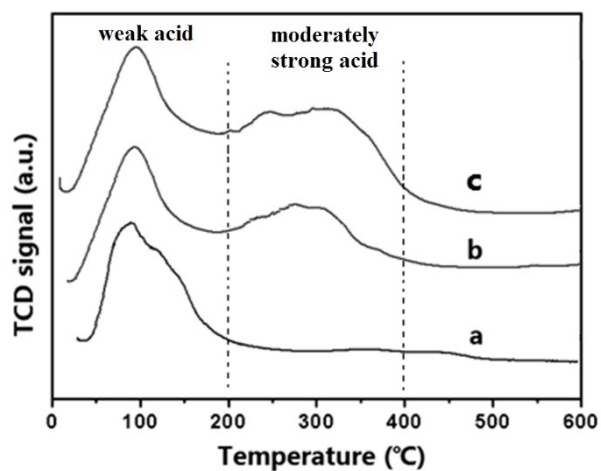

**Fig. S5** NH<sub>3</sub>-TPD curves of samples prepared by different method: a. 0.3%Pt-12%Fe/MCM-41-TM, b. 0.3%Pt@7%Fe-MCM-41, c. 0.3%Pt@12%Fe-MCM-41

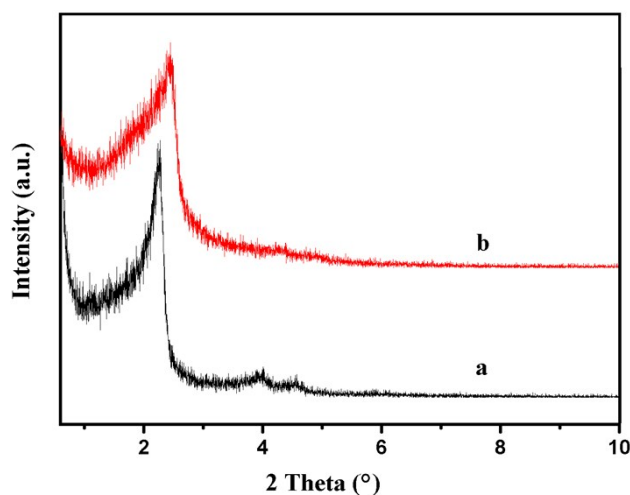

**Fig. S6** Low-angle XRD patterns of 0.3%Pt@7%Fe-MCM-41 sample: a. before reaction, b. after reaction

**Table S1** Density and distillation range of residual oil after hydrocracking over different catalysts

| Parameters                | Residual oil |                    |                     |                     |
|---------------------------|--------------|--------------------|---------------------|---------------------|
|                           | —            | 0.3%Pt@7%Fe-MCM-41 | 0.3%Pt@10%Fe-MCM-41 | 0.3%Pt@12%Fe-MCM-41 |
| Density                   | 0.9723       | 0.8856             | 0.8310              | 0.7988              |
| Initial boiling point, °C | 178          | 85                 | 80                  | 70                  |
| 10%, °C                   | 190          | 106                | 100                 | 85                  |
| 30%, °C                   | 198          | 110                | 100                 | 100                 |
| 50%, °C                   | 208          | 115                | 110                 | 110                 |
| 70%, °C                   | 220          | 140                | 120                 | 118                 |
| 90%, °C                   | 245          | 160                | 140                 | 135                 |
| 95%, °C                   | 254          | 175                | 160                 | 155                 |
| Dry point, °C             | 268          | 190                | 175                 | 170                 |
